# Supplementary material for: Technical note: The recovery rate of free particulate organic matter from soil samples is strongly affected by the method of density fractionation
Source: Copernicus journal article supplement (doi:10.5194/bg-20-1529-2023), 2023-04-17
Supplement: Supplementary file 1 [file bg-20-1529-2023-supplement.zip]

Archive with 2 entries (2 files):
- bg-20-1529-2023-supplement-title-page.pdf
- Supplements.ods
