# Supplementary material for: Technical note: The recovery rate of free particulate organic matter from soil samples is strongly affected by the method of density fractionation
Source: Copernicus journal article supplement (doi:10.5194/bg-20-1529-2023), 2023-04-17
Supplement: Supplementary file 1 [file bg-20-1529-2023-supplement.zip › bg-20-1529-2023-supplement-title-page.pdf]

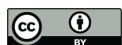

## *Supplement of*

# **Technical note: The recovery rate of free particulate organic matter from soil samples is strongly affected by the method of density fractionation**

**Frederick Büks**

*Correspondence to:* Frederick Büks ([frederick.bueks@tu-berlin.de](mailto:frederick.bueks@tu-berlin.de))

- [bg-20-1529-2023-supplement-title-page.pdf](#)
- [Supplements.ods](#)

The copyright of individual parts of the supplement might differ from the article licence.
