# Supplementary material for: Technical note: The recovery rate of free particulate organic matter from soil samples is strongly affected by the method of density fractionation
Source: Copernicus journal article supplement (doi:10.5194/bg-20-1529-2023), 2023-04-17
Supplement: Supplementary file 1 [file bg-20-1529-2023-supplement.zip › Supplements.ods]

## Sheet: recovery rate
			sample		initial POM	flask (empty)	flask+POM	extracted POM	recovery rate	mv	sd				Data	mv		sd
					[mg]	[mg]	[mg]	[mg]	[%]	[%]	[%]					Fine sand	Clayey silt	fine sand	clayey silt
		fine sand	Unmixed	A	200	5289,4	5442,1	152,7	76,4	68,3	9,0				Unmixed	68,3	58,9	9,0	13,7
				B	200	5326,6	5462,9	136,3	68,1						Trickled	98,2	95,2	1,1	3,9
				C	200	5264,8	5390,1	125,3	62,7						Rotated	95,4	90,4	2,8	5,8
				D	200	5251,7	5373,4	121,7	60,8						Pre-sonicated	93,8	97,4	4,7	2,3
				E	200	5285,2	5405,2	120,0	60,0
				F	200	5315,1	5478,5	163,4	81,7
			Trickled	A	200	5366,9	5561,1	194,2	97,1	98,2	1,1
				B	200	5303,7	5502,0	198,3	99,2
				C	200	5304,5	5502,8	198,3	99,2
				D	200	5288,8	5481,9	193,1	96,5
				E	200	5304,0	5501,2	197,2	98,6
				F	200	5287,1	5483,9	196,8	98,4
			Rotated	A	200	5289,4	5480,6	191,2	95,6	95,4	2,8
				B	200	5326,6	5522,3	195,7	97,8
				C	200	5264,8	5459,3	194,5	97,3
				D	200	5251,7	5433,6	181,9	91,0
				E	200	5285,2	5480,4	195,2	97,6
				F	200	5315,1	5501,6	186,5	93,3
			Pre-sonicated	A	200	5329,0	5520,1	191,1	95,6	93,8	4,7
				B	200	5308,9	5504,5	195,6	97,8
				C	200	5275,7	5467,8	192,1	96,1
				D	200	5322,3	5515,3	193,0	96,5
				E	200	5244,1	5427,4	183,3	91,6
				F	200	5249,0	5419,2	170,2	85,1
		clayey silt	Unmixed	A	200	5222,1	5316,8	94,7	47,3	58,9	13,7
				B	200	5345,3	5466,4	121,1	60,5						Tukey:		a b c bc						a bc b c
				C	200	5304,8	5418,7	113,9	56,9
				D	200	5294,1	5388,6	94,5	47,3
				E	200	5314,6	5428,3	113,7	56,8
				F	200	5310,4	5479,3	168,9	84,5
			Trickled	A	200	5298,5	5477,3	178,8	89,4	95,2	3,9
				B	200	5262,5	5460,5	198,0	99,0
				C	200	5348,4	5537,6	189,2	94,6
				D	200	5270,9	5454,5	183,6	91,8
				E	200	5310,4	5507,3	196,9	98,5
				F	200	5264,3	5460,1	195,8	97,9
			Rotated	A	200	5256,0	5454,2	198,2	99,1	90,4	5,8
				B	200	5325,9	5493,8	167,9	84,0
				C	200	5274,8	5452,3	177,5	88,8
				D	200	5288,3	5458,2	169,9	84,9
				E	200	5291,4	5473,3	181,9	91,0
				F	200	5328,0	5516,8	188,8	94,4
			Pre-sonicated	A	200	5268,4	5463,4	195,0	97,5	97,4	2,3
				B	200	5303,8	5498,9	195,1	97,5
				C	200	5332,8	5519,4	186,6	93,3
				D	200	5327,8	5522,0	194,2	97,1
				E	200	5271,8	5470,0	198,2	99,1
				F	200	5287,1	5487,1	200,0	100,0
			sample		initial POM	flask (empty)	flask+POM	extracted POM	recovery rate	mv	sd
					[mg]	[mg]	[mg]	[mg]	[%]	[mg]	[mg]
		POM	Unmixed	A	unknown	5292,8	5323,9	31,1	unknown	28,7	3,1
				B	unknown	5291,0	5320,7	29,7	unknown
				C	unknown	5278,2	5303,4	25,2	unknown
			Trickled	A	unknown	5284,2	5324,3	40,1	unknown	44,8	7,4
				B	unknown	5305,5	5346,4	40,9	unknown
				C	unknown	5309,7	5363,0	53,3	unknown
										p-value:	0,025

## Sheet: tmin
		min. stirring time tmin [sec]
			sandy soil	clayey soil
		A	4,9	35,8
		B	7,0	31,7
		C	7,0	32,8
		D	7,1	34,0
		E	8,9	36,5
		F	7,0	32,9
		mv	7,0	34,0
		sd	1,3	1,9
		corresponding energy [J/ml]
		Vtot [ml]		120
		P [J/s]		52,0579
			sandy soil	clayey soil
		A	2,1	15,5
		B	3,0	13,8
		C	3,0	14,2
		D	3,1	14,8
		E	3,9	15,8
		F	3,0	14,3
		mv	3,0	14,7
		sd	0,5	0,8

## Sheet: ultrasonication time
		Calculation of ultrasonication time
		Ultrasonication is a common tool to test the susceptibility of soil aggregate structure to mechanical stress and measure soil carbon pools. To help you with your work, we provide this open access sheet to calculate the sonication time needed for the application of a certain amount of mechanical stress (J/ml). The document is CCL by-sa (Frederick Büks) – feel free to optimize an share.
		The calculations are based on: North, P.: Towards an absolute measurement of soil structural stability using ultrasound, J. Soil Sci., 27, 451–459, https://doi.org/10.1111/j.1365-2389.1976.tb02014.x, 1976.
		dense solution		[g/cm3]		1,6	← If you intend to have another density cut-off, please note here.
		power		[W]=[J/s]		51,0707	← Use the sheet „USD calibration“ to measure the power output of your sonotrode.
		sd +/-		[W]=[J/s]		1,91	← This is the standadrd deviation given by your calibration parallels. It should be <2.0 J/s.
		calibration		[date]		15.01.19	← Please note the date of calibration and do not forget to attach a new sheet with every new calibration.
		soil	treatment	sample	q	date	flask	soil dw	water	flask, soil dw, water	added dense solution	needed density	flask, soil dw, water, dense solution	result. solution	volume solution	volume soil dw	total volume	Q	sonication time
					[J/ml]		[g]	[g]	[g, ml]	[g]	[ml]	[g/cm-3]	[g]	[g]	[ml]=[cm3]	[ml]	[ml]	[J]	[s]	[min,s]
		sandy	filled up	A	50	04.09.21	22,79	20	4	46,79	100	1,62	209,19	166,40	104,00	7,55	111,55	5577,4	109	1,49
				B	50	04.09.21	22,26	20	4	46,26	100	1,62	208,66	166,40	104,00	7,55	111,55	5577,4	109	1,49
				C	50	04.09.21	23,7	20	4	47,7	100	1,62	210,1	166,40	104,00	7,55	111,55	5577,4	109	1,49
				D	50	04.09.21	22,18	20	4	46,18	100	1,62	208,58	166,40	104,00	7,55	111,55	5577,4	109	1,49
				E	50	04.09.21	22,17	20	4	46,17	100	1,62	208,57	166,40	104,00	7,55	111,55	5577,4	109	1,49
				F	50	04.09.21	21,99	20	4	45,99	100	1,62	208,39	166,40	104,00	7,55	111,55	5577,4	109	1,49
			trickled	A	50	04.09.21	24,922	20	4	48,922	100	1,62	211,322	166,40	104,00	7,55	111,55	5577,4	109	1,49
				B	50	04.09.21	22,348	20	4	46,348	100	1,62	208,748	166,40	104,00	7,55	111,55	5577,4	109	1,49
				C	50	04.09.21	23,983	20	4	47,983	100	1,62	210,383	166,40	104,00	7,55	111,55	5577,4	109	1,49
				D	50	04.09.21	22,84	20	4	46,84	100	1,62	209,24	166,40	104,00	7,55	111,55	5577,4	109	1,49
				E	50	04.09.21	23,944	20	4	47,944	100	1,62	210,344	166,40	104,00	7,55	111,55	5577,4	109	1,49
				F	50	04.09.21	22,82	20	4	46,82	100	1,62	209,22	166,40	104,00	7,55	111,55	5577,4	109	1,49
			rotated	A	50	04.09.21	24,02	20	4	48,02	100	1,62	210,42	166,40	104,00	7,55	111,55	5577,4	109	1,49
				B	50	04.09.21	22,78	20	4	46,78	100	1,62	209,18	166,40	104,00	7,55	111,55	5577,4	109	1,49
				C	50	04.09.21	24,33	20	4	48,33	100	1,62	210,73	166,40	104,00	7,55	111,55	5577,4	109	1,49
				D	50	04.09.21	23,07	20	4	47,07	100	1,62	209,47	166,40	104,00	7,55	111,55	5577,4	109	1,49
				E	50	04.09.21	22,59	20	4	46,59	100	1,62	208,99	166,40	104,00	7,55	111,55	5577,4	109	1,49
				F	50	04.09.21	22,12	20	4	46,12	100	1,62	208,52	166,40	104,00	7,55	111,55	5577,4	109	1,49
			pre-sonicated	A	3	04.09.21	23,98	20	4	47,98	100	1,62	210,38	166,40	104,00	7,55	111,55	334,6	7	0,07
					47	04.09.21	23,98	20	4	47,98	100	1,62	210,38	166,40	104,00	7,55	111,55	5242,7	103	1,43
				B	3	04.09.21	23,641	20	4	47,641	100	1,62	210,041	166,40	104,00	7,55	111,55	334,6	7	0,07
					47	04.09.21	23,641	20	4	47,641	100	1,62	210,041	166,40	104,00	7,55	111,55	5242,7	103	1,43
				C	3	04.09.21	22,24	20	4	46,24	100	1,62	208,64	166,40	104,00	7,55	111,55	334,6	7	0,07
					47	04.09.21	22,24	20	4	46,24	100	1,62	208,64	166,40	104,00	7,55	111,55	5242,7	103	1,43
				D	3	04.09.21	23,018	20	4	47,018	100	1,62	209,418	166,40	104,00	7,55	111,55	334,6	7	0,07
					47	04.09.21	23,018	20	4	47,018	100	1,62	209,418	166,40	104,00	7,55	111,55	5242,7	103	1,43
				E	3	04.09.21	22,65	20	4	46,65	100	1,62	209,05	166,40	104,00	7,55	111,55	334,6	7	0,07
					47	04.09.21	22,65	20	4	46,65	100	1,62	209,05	166,40	104,00	7,55	111,55	5242,7	103	1,43
				F	3	04.09.21	22,74	20	4	46,74	100	1,62	209,14	166,40	104,00	7,55	111,55	334,6	7	0,07
					47	04.09.21	22,74	20	4	46,74	100	1,62	209,14	166,40	104,00	7,55	111,55	5242,7	103	1,43
		loamy	filled up	A	50	16.03.22	22,62	20	4	46,62	100	1,62	209,02	166,40	104,00	7,55	111,55	5577,4	109	1,49
				B	50	16.03.22	24,09	20	4	48,09	100	1,62	210,49	166,40	104,00	7,55	111,55	5577,4	109	1,49
				C	50	16.03.22	23,67	20	4	47,67	100	1,62	210,07	166,40	104,00	7,55	111,55	5577,4	109	1,49
				D	50	16.03.22	24,15	20	4	48,15	100	1,62	210,55	166,40	104,00	7,55	111,55	5577,4	109	1,49
				E	50	16.03.22	23,65	20	4	47,65	100	1,62	210,05	166,40	104,00	7,55	111,55	5577,4	109	1,49
				F	50	16.03.22	23,33	20	4	47,33	100	1,62	209,73	166,40	104,00	7,55	111,55	5577,4	109	1,49
			trickled	A	50	16.03.22	22,95	20	4	46,95	100	1,62	209,35	166,40	104,00	7,55	111,55	5577,4	109	1,49
				B	50	16.03.22	23,46	20	4	47,46	100	1,62	209,86	166,40	104,00	7,55	111,55	5577,4	109	1,49
				C	50	16.03.22	23,08	20	4	47,08	100	1,62	209,48	166,40	104,00	7,55	111,55	5577,4	109	1,49
				D	50	16.03.22	24,33	20	4	48,33	100	1,62	210,73	166,40	104,00	7,55	111,55	5577,4	109	1,49
				E	50	16.03.22	22,75	20	4	46,75	100	1,62	209,15	166,40	104,00	7,55	111,55	5577,4	109	1,49
				F	50	16.03.22	24,05	20	4	48,05	100	1,62	210,45	166,40	104,00	7,55	111,55	5577,4	109	1,49
			rotated	A	50	16.03.22	23,25	20	4	47,25	100	1,62	209,65	166,40	104,00	7,55	111,55	5577,4	109	1,49
				B	50	16.03.22	24,24	20	4	48,24	100	1,62	210,64	166,40	104,00	7,55	111,55	5577,4	109	1,49
				C	50	16.03.22	22,63	20	4	46,63	100	1,62	209,03	166,40	104,00	7,55	111,55	5577,4	109	1,49
				D	50	16.03.22	23,66	20	4	47,66	100	1,62	210,06	166,40	104,00	7,55	111,55	5577,4	109	1,49
				E	50	16.03.22	22,67	20	4	46,67	100	1,62	209,07	166,40	104,00	7,55	111,55	5577,4	109	1,49
				F	50	16.03.22	24,89	20	4	48,89	100	1,62	211,29	166,40	104,00	7,55	111,55	5577,4	109	1,49
			pre-sonicated	A	15	16.03.22	23,08	20	4	47,08	100	1,62	209,48	166,40	104,00	7,55	111,55	1673,2	33	0,33
					35	16.03.22	23,08	20	4	47,08	100	1,62	209,48	166,40	104,00	7,55	111,55	3904,2	76	1,16
				B	15	16.03.22	24,08	20	4	48,08	100	1,62	210,48	166,40	104,00	7,55	111,55	1673,2	33	0,33
					35	16.03.22	24,08	20	4	48,08	100	1,62	210,48	166,40	104,00	7,55	111,55	3904,2	76	1,16
				C	15	16.03.22	23,55	20	4	47,55	100	1,62	209,95	166,40	104,00	7,55	111,55	1673,2	33	0,33
					35	16.03.22	23,55	20	4	47,55	100	1,62	209,95	166,40	104,00	7,55	111,55	3904,2	76	1,16
				D	15	16.03.22	25,15	20	4	49,15	100	1,62	211,55	166,40	104,00	7,55	111,55	1673,2	33	0,33
					35	16.03.22	25,15	20	4	49,15	100	1,62	211,55	166,40	104,00	7,55	111,55	3904,2	76	1,16
				E	15	16.03.22	25,08	20	4	49,08	100	1,62	211,48	166,40	104,00	7,55	111,55	1673,2	33	0,33
					35	16.03.22	25,08	20	4	49,08	100	1,62	211,48	166,40	104,00	7,55	111,55	3904,2	76	1,16
				F	15	16.03.22	23,91	20	4	47,91	100	1,62	210,31	166,40	104,00	7,55	111,55	1673,2	33	0,33
					35	16.03.22	23,91	20	4	47,91	100	1,62	210,31	166,40	104,00	7,55	111,55	3904,2	76	1,16

## Sheet: SOM data
		basic data															POM fraction			POM cumulative			Corg fraction						Corg cumulative
		soil	variant	parallels	q	initial weight	flask	flask, POM (oven-dry)	C	N	C:N	mv	sd	Ctot	Ccarb	Corg	POM (oven-dry)	mv	sd	ΣPOM (oven-dry)	mw	sd	C	mv	sd	Crel	mw	sd	ΣC	MW	SD	ΣCrel	MW	SD
					[J/ml]	[g]	[g]	[g]	[%]	[%]	[-]	[-]	[-]	[g]	[g]	[g]	[g/kg]	[g/kg]	[g/kg]	[g]	[g]	[g]	[g/kg]	[g/kg]	[g/kg]	[wt%]	[wt%]	[wt%]	[g/kg]	[g/kg]	[g/kg]	[wt%]	[wt%]	[wt%]
		sandy	filled up	A	0	20,00	9,0104	9,1585	30,46	1,45	21,07	20,84	1,35	0,05	0,00	0,05	7,40	6,86	1,37	7,40	6,86	1,37	2,26	1,94	0,41	5,41	4,68	0,91	2,26	1,94	0,41	4,51	3,97	0,69
					50	20,00	8,1494	8,3241	43,21	2,28	18,94	18,94	0,47	0,08	0,00	0,08	8,73	8,84	0,20	16,14	15,70	1,38	3,77	3,42	0,74	9,05	8,23	1,67	6,03	5,36	1,04	12,06	10,94	1,70
					residuum	20,00	22,7900	64,1090	1,73	0,20	8,62	8,76	0,21	0,71	0,00	0,71	2065,95	2000,50	87,09	2082,09	2016,20	87,37	35,67	36,05	0,90	85,54	87,10	2,26	41,70	41,41	1,45	83,42	85,10	2,24
				B	0	20,00	9,0837	9,2128	32,01	1,45	22,01			0,04	0,00	0,04	6,45			6,45			2,07			4,74			2,07			4,02
					50	20,00	9,0205	9,1956	41,59	2,12	19,66			0,07	0,00	0,07	8,76			15,21			3,64			8,36			5,71			11,12
					residuum	20,00	22,2600	60,8960	1,96	0,22	9,04			0,76	0,00	0,76	1931,80			1947,01			37,87			86,90			43,58			84,86
				C	0	20,00	8,4283	8,5753	26,46	1,37	19,37			0,04	0,00	0,04	7,35			7,35			1,94			4,70			1,94			3,97
					50	20,00	8,6165	8,7975	41,35	2,24	18,45			0,07	0,00	0,07	9,05			16,40			3,74			9,04			5,69			11,60
					residuum	20,00	23,7000	65,9790	1,69	0,20	8,49			0,71	0,00	0,71	2113,95			2130,35			35,68			86,26			41,37			84,43
				D	0	20,00	8,6369	8,8168	27,44	1,27	21,56			0,05	0,00	0,05	9,00			9,00			2,47			5,90			2,47			4,89
					50	20,00	8,5283	8,7038	41,69	2,27	18,39			0,07	0,00	0,07	8,77			17,77			3,66			8,75			6,13			12,15
					residuum	20,00	22,1800	61,6880	1,81	0,21	8,78			0,71	0,00	0,71	1975,40			1993,17			35,70			85,35			41,83			82,96
				E	0	20,00	9,6355	9,7508	26,14	1,38	18,98			0,03	0,00	0,03	5,76			5,76			1,51			3,69			1,51			3,16
					50	20,00	8,7585	8,9412	41,48	2,16	19,18			0,08	0,00	0,08	9,14			14,90			3,79			9,27			5,30			11,11
					residuum	20,00	22,1700	59,7930	1,89	0,21	8,94			0,71	0,00	0,71	1881,15			1896,05			35,56			87,04			40,86			85,73
				F	0	20,00	8,6538	8,7571	27,46	1,24	22,06			0,03	0,00	0,03	5,16			5,16			1,42			3,62			1,42			3,23
					50	20,00	8,9845	9,1567	22,17	1,16	19,04			0,04	0,00	0,04	8,61			13,78			1,91			4,88			3,33			7,58
					residuum	20,00	21,9900	62,6850	1,76	0,20	8,68			0,72	0,00	0,72	2034,75			2048,53			35,80			91,50			39,13			89,18
			trickled	A*	0	20,00	9,2393	9,5627	28,22	1,47	19,23	19,46	0,96	0,09	0,00	0,09	16,17	13,52	2,97	16,17	13,52	2,97	4,56	3,78	0,73	10,26	8,97	1,62	4,56	3,78	0,73	8,06	7,20	1,18
					50	20,00	8,9486	9,1067	37,71	2,42	15,59	16,02	0,66	0,06	0,00	0,06	7,90	7,28	2,12	24,07	20,80	3,63	2,98	2,71	0,93	6,70	6,37	2,10	7,54	6,50	1,19	13,33	12,31	1,59
					residuum	20,00	24,9220	53,2150	2,61	0,27	9,66	9,40	0,48	0,74	0,00	0,74	1414,65	1542,93	266,02	1438,73	1563,72	265,03	36,94	35,68	1,86	83,04	84,66	2,33	44,48	42,18	2,49	78,60	80,49	2,26
				B*	0	20,00	8,1091	8,4254	28,27	1,56	18,17			0,09	0,00	0,09	15,82			15,82			4,47			10,39			4,47			8,17
					50	20,00	8,6518	8,7978	37,69	2,32	16,23			0,06	0,00	0,06	7,30			23,12			2,75			6,40			7,22			13,20
					residuum	20,00	22,3480	48,9920	2,69	0,28	9,76			0,72	0,00	0,72	1332,20			1355,32			35,80			83,21			43,02			78,63
				C*	0	20,00	9,7401	10,0659	24,99	1,27	19,63			0,08	0,00	0,08	16,29			16,29			4,07			9,50			4,07			7,60
					50	20,00	9,0143	9,1532	37,45	2,36	15,87			0,05	0,00	0,05	6,94			23,23			2,60			6,07			6,67			12,45
					residuum	20,00	23,9830	51,2310	2,66	0,28	9,64			0,72	0,00	0,72	1362,40			1385,64			36,18			84,43			42,85			79,95
				D	0	20,00	8,8089	9,0411	29,69	1,41	21,07			0,07	0,00	0,07	11,61			11,61			3,45			8,26			3,45			6,56
					50	20,00	8,7433	8,9490	38,59	2,28	16,89			0,08	0,00	0,08	10,29			21,90			3,97			9,51			7,42			14,10
					residuum	20,00	22,8400	62,7800	1,72	0,20	8,60			0,69	0,00	0,69	1997,00			2018,90			34,31			82,22			41,72			79,34
				E*	0	20,00	8,4063	8,5924	28,34	1,49	19,00			0,05	0,00	0,05	9,31			9,31			2,64			6,06			2,64			5,10
					50	20,00	8,2799	8,4307	38,15	2,31	16,50			0,06	0,00	0,06	7,54			16,85			2,88			6,61			5,51			10,67
					residuum	20,00	23,9440	52,2300	2,69	0,28	9,71			0,76	0,00	0,76	1414,30			1431,15			38,03			87,34			43,54			84,23
				F	0	20,00	9,1636	9,4018	29,45	1,50	19,67			0,07	0,00	0,07	11,91			11,91			3,51			9,37			3,51			7,70
					50	20,00	8,6885	8,7581	31,50	2,09	15,06			0,02	0,00	0,02	3,70			15,61			1,10			2,93			4,60			10,11
					residuum	20,00	22,8200	57,5600	1,89	0,21	9,01			0,66	0,00	0,66	1737,00			1752,61			32,83			87,70			37,43			82,19
			rotated	A	0	20,00	8,7408	8,9627	27,00	1,34	20,11	19,88	1,01	0,06	0,00	0,06	11,10	9,37	1,79	11,10	9,37	1,79	3,00	2,74	0,55	7,17	6,67	1,36	3,00	2,74	0,55	5,92	5,50	1,06
					50	20,00	8,5154	8,6582	38,77	2,42	16,04	17,39	1,09	0,06	0,00	0,06	7,14	7,81	1,65	18,24	17,18	1,41	2,77	3,15	0,70	6,62	7,65	1,69	5,76	5,89	0,47	11,40	11,83	0,84
					residuum	20,00	24,0200	61,2140	1,94	0,22	8,91	8,75	0,15	0,72	0,00	0,72	1859,70	1945,12	51,87	1877,94	1962,30	51,29	36,03	35,24	0,67	86,21	85,68	1,16	41,79	41,13	0,46	82,67	82,67	1,28
				B	0	20,00	9,0229	9,2356	31,63	1,57	20,19			0,07	0,00	0,07	10,64			10,64			3,36			8,26			3,36			6,66
					50	20,00	8,3772	8,5298	39,48	2,44	16,20			0,06	0,00	0,06	7,63			18,27			3,01			7,39			6,38			12,63
					residuum	20,00	22,7800	60,8590	1,81	0,21	8,76			0,69	0,00	0,69	1903,95			1922,22			34,37			84,35			40,75			80,71
				C	0	20,00	8,4983	8,6284	28,45	1,59	17,86			0,04	0,00	0,04	6,50			6,50			1,85			4,49			1,85			3,79
					50	20,00	9,2763	9,4645	41,04	2,34	17,54			0,08	0,00	0,08	9,41			15,91			3,86			9,37			5,71			11,71
					residuum	20,00	24,3300	63,6280	1,81	0,20	8,93			0,71	0,00	0,71	1964,90			1980,82			35,50			86,14			41,22			84,50
				D	0	20,00	8,4922	8,6500	29,70	1,46	20,32			0,05	0,00	0,05	7,89			7,89			2,34			5,65			2,34			4,67
					50	20,00	8,6218	8,8161	41,05	2,30	17,88			0,08	0,00	0,08	9,72			17,61			3,99			9,61			6,33			12,62
					residuum	20,00	23,0700	62,7420	1,77	0,20	8,71			0,70	0,00	0,70	1983,60			2001,21			35,17			84,74			41,50			82,71
				E	0	20,00	8,6353	8,8311	30,84	1,49	20,71			0,06	0,00	0,06	9,79			9,79			3,02			7,38			3,02			6,15
					50	20,00	8,9187	9,0219	40,62	2,15	18,90			0,04	0,00	0,04	5,16			14,95			2,10			5,12			5,12			10,43
					residuum	20,00	22,5900	61,9500	1,82	0,21	8,63			0,72	0,00	0,72	1968,00			1982,95			35,81			87,50			40,93			83,42
				F	0	20,00	9,2610	9,4666	27,93	1,39	20,06			0,06	0,00	0,06	10,28			10,28			2,87			7,07			2,87			5,80
					50	20,00	9,1099	9,2663	40,43	2,27	17,80			0,06	0,00	0,06	7,82			18,10			3,16			7,79			6,03			12,19
					residuum	20,00	22,1200	61,9310	1,74	0,20	8,57			0,69	0,00	0,69	1990,55			2008,65			34,56			85,14			40,59			82,01
			pre-sonicated	A	3	20,00	8,7436	9,0195	39,56	1,77	22,30	20,81	1,87	0,11	0,00	0,11	13,80	12,97	2,81	13,80	12,97	2,81	5,46	4,78	0,92	12,83	11,46	2,16	5,46	4,78	0,92	9,91	8,93	1,41
					47	20,00	9,5354	9,6201	37,33	2,44	15,30	15,45	0,77	0,03	0,00	0,03	4,24	5,73	1,33	18,03	18,69	3,35	1,58	1,97	0,54	3,72	4,75	1,39	7,04	6,75	1,14	12,79	12,64	1,83
					residuum	20,00	23,9800	64,8090	1,74	0,19	8,95	9,13	0,52	0,71	0,00	0,71	2041,45	1801,64	347,88	2059,48	1820,34	345,61	35,51	34,96	1,82	83,46	83,79	2,84	42,55	41,71	1,18	77,30	78,42	3,10
				B*	3	20,00	9,5272	9,8301	34,31	1,79	19,14			0,10	0,00	0,10	15,15			15,15			5,20			12,71			5,20			9,80
					47	20,00	9,2594	9,3632	34,02	2,34	14,55			0,04	0,00	0,04	5,19			20,34			1,77			4,32			6,96			13,13
					residuum	20,00	23,6410	50,8870	2,49	0,26	9,64			0,68	0,00	0,68	1362,30			1382,64			33,91			82,97			40,87			77,07
				C	3	20,00	8,6590	8,8332	38,92	1,65	23,52			0,07	0,00	0,07	8,71			8,71			3,39			7,93			3,39			6,67
					47	20,00	8,8191	8,9123	28,10	1,76	15,92			0,03	0,00	0,03	4,66			13,37			1,31			3,06			4,70			9,25
					residuum	20,00	22,2400	63,0170	1,87	0,20	9,31			0,76	0,00	0,76	2038,85			2052,22			38,03			89,00			42,73			84,08
				D*	3	20,00	8,6620	8,9805	36,08	1,79	20,20			0,11	0,00	0,11	15,92			15,92			5,75			13,36			5,75			10,16
					47	20,00	8,3177	8,4404	33,16	2,19	15,16			0,04	0,00	0,04	6,14			22,06			2,03			4,73			7,78			13,76
					residuum	20,00	23,0180	50,2290	2,59	0,27	9,75			0,70	0,00	0,70	1360,55			1382,61			35,24			81,91			43,02			76,08
				E	3	20,00	8,6279	8,8363	37,79	1,80	21,05			0,08	0,00	0,08	10,42			10,42			3,94			9,67			3,94			7,73
					47	20,00	8,4720	8,5965	38,21	2,28	16,73			0,05	0,00	0,05	6,23			16,65			2,38			5,84			6,32			12,39
					residuum	20,00	22,6500	64,8320	1,63	0,19	8,47			0,69	0,00	0,69	2109,10			2125,75			34,40			84,49			40,72			79,88
				F	3	20,00	8,5814	8,8575	35,83	1,92	18,65			0,10	0,00	0,10	13,81			13,81			4,95			12,25			4,95			9,33
					47	20,00	8,5123	8,6707	34,93	2,32	15,03			0,06	0,00	0,06	7,92			21,73			2,77			6,85			7,71			14,54
					residuum	20,00	22,7400	60,6920	1,72	0,20	8,67			0,65	0,00	0,65	1897,60			1919,33			32,67			80,90			40,38			76,13
		loamy	filled up	A	0	20,00	8,9185	9,0441	32,97	1,26	26,09	26,05	0,93	0,04	0,00	0,04	6,28	5,44	1,67	6,28	5,44	1,67	2,07	1,82	0,52	5,31	5,18	1,46	2,07	1,82	0,52	4,21	4,03	1,00
					50	20,00	8,8395	9,1022	45,81	2,04	22,46	22,00	0,89	0,12	0,00	0,12	13,14	13,42	1,43	19,42	18,86	1,75	6,02	5,95	0,34	15,43	17,31	5,00	8,09	7,77	0,41	16,45	17,48	3,34
					residuum	20,00	22,6200	50,2860	2,24	0,18	12,41	12,15	0,27	0,62	0,00	0,62	1383,30	1439,56	55,26	1402,72	1458,42	55,58	30,92	28,20	6,72	79,27	77,50	5,76	39,01	35,97	6,86	79,34	78,49	3,88
				B	0	20,00	9,7669	9,8542	32,02	1,31	24,35			0,03	0,00	0,03	4,37			4,37			1,40			3,56			1,40			2,89
					50	20,00	8,5581	8,8799	38,92	1,75	22,22			0,13	0,00	0,13	16,09			20,46			6,26			15,94			7,66			15,85
					residuum	20,00	24,0900	52,0940	2,26	0,18	12,24			0,63	0,00	0,63	1400,20			1420,66			31,62			80,50			39,28			81,26
				C	0	20,00	8,8291	8,9464	33,84	1,28	26,51			0,04	0,00	0,04	5,87			5,87			1,98			5,25			1,98			4,21
					50	20,00	8,7711	9,0064	45,59	2,15	21,20			0,11	0,00	0,11	11,76			17,63			5,36			14,20			7,35			15,60
					residuum	20,00	23,6700	53,6740	2,03	0,17	11,94			0,61	0,00	0,61	1500,20			1517,83			30,43			80,55			37,78			80,19
				D	0	20,00	8,8581	8,9454	34,05	1,32	25,80			0,03	0,00	0,03	4,36			4,36			1,49			6,75			1,49			4,79
					50	20,00	8,2439	8,5122	44,97	2,03	22,12			0,12	0,00	0,12	13,42			17,78			6,03			27,40			7,52			24,23
					residuum	20,00	24,1500	52,6750	1,02	0,08	12,44			0,29	0,00	0,29	1426,25			1444,03			14,50			65,86			22,02			70,98
				E	0	20,00	10,3873	10,4591	36,80	1,39	26,50			0,03	0,00	0,03	3,59			3,59			1,32			3,45			1,32			2,80
					50	20,00	9,3642	9,6270	47,46	2,04	23,23			0,12	0,00	0,12	13,14			16,73			6,24			16,29			7,56			16,02
					residuum	20,00	23,6500	51,8720	2,18	0,18	12,11			0,61	0,00	0,61	1411,10			1427,83			30,73			80,26			38,29			81,18
				F	0	20,00	8,8060	8,9692	32,80	1,21	27,04			0,05	0,00	0,05	8,16			8,16			2,68			6,79			2,68			5,29
					50	20,00	8,7906	9,0504	44,41	2,14	20,75			0,12	0,00	0,12	12,99			21,15			5,77			14,63			8,45			16,70
					residuum	20,00	23,3300	53,6560	2,04	0,17	11,76			0,62	0,00	0,62	1516,30			1537,45			31,00			78,59			39,44			78,00
			trickled	A	0	20,00	9,3907	9,7318	34,73	1,37	25,35	25,34	1,55	0,12	0,00	0,12	17,06	14,94	1,96	17,06	14,94	1,96	5,92	5,18	0,70	14,42	13,78	3,01	5,92	5,18	0,70	10,10	9,72	1,73
					50	20,00	8,6006	8,8708	42,25	2,12	19,92	20,07	0,29	0,11	0,00	0,11	13,51	12,39	2,19	30,56	27,33	2,47	5,71	5,19	0,88	13,89	13,54	1,21	11,63	10,37	0,93	19,84	19,34	0,88
					residuum	20,00	22,9500	52,0080	2,03	0,18	11,48	11,79	0,32	0,59	0,00	0,59	1452,90	1348,89	187,51	1483,47	1376,22	188,77	29,45	27,77	3,46	71,69	72,68	2,20	41,08	38,14	4,07	70,06	70,95	2,52
				B	0	20,00	8,4568	8,7499	34,53	1,44	23,95			0,10	0,00	0,10	14,66			14,66			5,06			12,36			5,06			8,97
					50	20,00	8,5804	8,8347	42,31	2,06	20,51			0,11	0,00	0,11	12,72			27,37			5,38			13,14			10,44			18,50
					residuum	20,00	23,4600	51,0880	2,21	0,18	12,32			0,61	0,00	0,61	1381,40			1408,77			30,49			74,49			40,93			72,53
				C	0	20,00	9,1834	9,4852	33,66	1,37	24,58			0,10	0,00	0,10	15,09			15,09			5,08			12,81			5,08			9,19
					50	20,00	10,0357	10,3013	40,88	2,05	19,93			0,11	0,00	0,11	13,28			28,37			5,43			13,69			10,51			19,02
					residuum	20,00	23,0800	51,3530	2,06	0,17	11,89			0,58	0,00	0,58	1413,65			1442,02			29,15			73,51			39,66			71,79
				D	0	20,00	9,0143	9,3114	34,97	1,35	25,94			0,10	0,00	0,10	14,86			14,86			5,20			13,29			5,20			9,39
					50	20,00	8,9139	9,1927	41,79	2,12	19,68			0,12	0,00	0,12	13,94			28,80			5,83			14,90			11,02			19,93
					residuum	20,00	24,3300	52,4060	2,00	0,17	11,66			0,56	0,00	0,56	1403,80			1432,60			28,07			71,81			39,09			70,68
				E	0	20,00	9,4934	9,7229	34,57	1,43	24,13			0,08	0,00	0,08	11,48			11,48			3,97			10,47			3,97			7,75
					50	20,00	8,9601	9,2173	41,87	2,08	20,12			0,11	0,00	0,11	12,86			24,33			5,38			14,21			9,35			18,26
					residuum	20,00	22,7500	52,1440	1,94	0,17	11,50			0,57	0,00	0,57	1469,70			1494,04			28,53			75,32			37,89			73,99
				F	0	20,00	8,7431	9,0738	35,30	1,26	28,10			0,12	0,00	0,12	16,54			16,54			5,84			19,34			5,84			12,89
					50	20,00	8,5560	8,7163	42,87	2,12	20,26			0,07	0,00	0,07	8,02			24,55			3,44			11,38			9,27			20,47
					residuum	20,00	24,0500	43,4880	2,15	0,18	11,89			0,42	0,00	0,42	971,90			996,45			20,91			69,28			30,19			66,64
			rotated	A	0	20,00	8,6089	8,8075	36,39	1,39	26,25	27,62	1,55	0,07	0,00	0,07	9,93	9,68	0,95	9,93	9,68	0,95	3,61	3,37	0,37	9,25	8,62	0,88	3,61	3,37	0,37	7,04	6,57	0,61
					50	20,00	8,7396	8,9802	42,02	2,15	19,51	20,52	0,78	0,10	0,00	0,10	12,03	12,82	0,87	21,96	22,50	1,29	5,06	5,43	0,36	12,94	13,88	0,83	8,67	8,81	0,44	16,89	17,16	0,43
					residuum	20,00	23,2500	52,0200	2,11	0,18	11,98	12,01	0,35	0,61	0,00	0,61	1438,50	1408,87	36,70	1460,46	1431,37	36,46	30,39	30,32	0,55	77,80	77,50	0,76	39,06	39,12	0,85	76,07	76,27	0,83
				B	0	20,00	8,7249	8,9341	34,33	1,32	25,96			0,07	0,00	0,07	10,46			10,46			3,59			8,93			3,59			6,81
					50	20,00	9,0397	9,2902	42,89	2,11	20,36			0,11	0,00	0,11	12,53			22,99			5,37			13,36			8,96			16,99
					residuum	20,00	24,2400	51,0560	2,33	0,18	12,70			0,62	0,00	0,62	1340,80			1363,79			31,24			77,71			40,21			76,21
				C	0	20,00	8,4624	8,6642	35,82	1,28	27,89			0,07	0,00	0,07	10,09			10,09			3,61			9,41			3,61			7,12
					50	20,00	8,8526	9,1004	41,30	2,09	19,72			0,10	0,00	0,10	12,39			22,48			5,12			13,32			8,73			17,20
					residuum	20,00	22,6300	50,4950	2,13	0,18	11,83			0,59	0,00	0,59	1393,25			1415,73			29,67			77,27			38,40			75,67
				D	0	20,00	8,9494	9,1188	34,53	1,24	27,90			0,06	0,00	0,06	8,47			8,47			2,93			7,69			2,93			5,95
					50	20,00	8,6401	8,8829	43,59	2,07	21,01			0,11	0,00	0,11	12,14			20,61			5,29			13,91			8,22			16,70
					residuum	20,00	23,6600	52,2300	2,09	0,18	11,75			0,60	0,00	0,60	1428,50			1449,11			29,84			78,41			38,05			77,35
				E	0	20,00	8,5829	8,7951	34,30	1,13	30,31			0,07	0,00	0,07	10,61			10,61			3,64			9,10			3,64			6,84
					50	20,00	9,3068	9,5854	42,41	1,99	21,33			0,12	0,00	0,12	13,93			24,54			5,91			14,77			9,55			17,95
					residuum	20,00	22,6700	51,2140	2,13	0,18	12,03			0,61	0,00	0,61	1427,20			1451,74			30,45			76,13			40,00			75,21
				F	0	20,00	8,4807	8,6510	33,63	1,23	27,43			0,06	0,00	0,06	8,51			8,51			2,86			7,34			2,86			5,66
					50	20,00	8,7057	8,9843	41,94	1,98	21,19			0,12	0,00	0,12	13,93			22,44			5,84			14,97			8,71			17,21
					residuum	20,00	24,8900	53,3890	2,13	0,18	11,81			0,61	0,00	0,61	1424,95			1447,40			30,31			77,69			39,02			77,13
			pre-sonicated	A	15	20,00	9,1900	9,5146	44,06	1,80	24,48	24,15	0,61	0,14	0,00	0,14	16,23	15,64	1,69	16,23	15,64	1,69	7,15	6,72	0,61	18,36	17,13	1,16	7,15	6,72	0,61	13,39	12,58	0,75
					35	20,00	9,0352	9,0436	36,47	2,07	17,58	20,23	5,45	0,00	0,00	0,00	0,42	1,96	1,67	16,65	17,60	1,68	0,15	0,72	0,63	0,39	1,86	1,65	7,30	7,44	0,54	13,68	13,95	0,75
					residuum	20,00	23,0800	50,2520	2,33	0,19	12,56	12,53	0,20	0,63	0,00	0,63	1358,60	1400,71	37,41	1375,25	1418,31	38,08	31,65	31,72	0,97	81,25	81,01	1,16	38,95	39,15	1,17	72,93	73,47	0,88
				B	15	20,00	9,2795	9,5826	42,89	1,77	24,22			0,13	0,00	0,13	15,15			15,15			6,50			16,92			6,50			12,61
					35	20,00	8,7641	8,7704	42,38	1,36	31,18			0,00	0,00	0,00	0,32			15,47			0,13			0,35			6,63			12,87
					residuum	20,00	24,0800	52,0310	2,27	0,18	12,78			0,64	0,00	0,64	1397,55			1413,02			31,79			82,74			38,43			74,53
				C	15	20,00	8,5246	8,8028	42,99	1,76	24,44			0,12	0,00	0,12	13,91			13,91			5,98			15,83			5,98			11,61
					35	20,00	8,7091	8,8031	37,96	2,11	17,96			0,04	0,00	0,04	4,70			18,61			1,78			4,72			7,76			15,07
					residuum	20,00	23,5500	52,7440	2,06	0,17	12,20			0,60	0,00	0,60	1459,70			1478,31			30,00			79,44			37,76			73,32
				D	15	20,00	8,4998	8,7784	44,33	1,79	24,71			0,12	0,00	0,12	13,93			13,93			6,18			15,99			6,18			11,91
					35	20,00	8,6357	8,6825	37,13	2,06	18,03			0,02	0,00	0,02	2,34			16,27			0,87			2,25			7,04			13,59
					residuum	20,00	25,1500	52,8200	2,28	0,18	12,65			0,63	0,00	0,63	1383,50			1399,77			31,59			81,77			38,63			74,50
				E	15	20,00	8,8306	9,1557	42,52	1,77	24,06			0,14	0,00	0,14	16,26			16,26			6,91			17,08			6,91			12,51
					35	20,00	8,6580	8,7136	34,52	2,05	16,82			0,02	0,00	0,02	2,78			19,04			0,96			2,37			7,87			14,25
					residuum	20,00	25,0800	53,6640	2,28	0,18	12,55			0,65	0,00	0,65	1429,20			1448,24			32,60			80,55			40,48			73,25
				F	15	20,00	9,3870	9,7544	41,22	1,79	22,99			0,15	0,00	0,15	18,37			18,37			7,57			18,62			7,57			13,46
					35	20,00	8,6875	8,7116	36,27	1,83	19,80			0,01	0,00	0,01	1,21			19,58			0,44			1,07			8,01			14,24
					residuum	20,00	23,9100	51,4240	2,37	0,19	12,44			0,65	0,00	0,65	1375,70			1395,28			32,67			80,31			40,68			72,30

## Sheet: Statistics POM
		basic data							POM fraction
		soil	variant	parallels	q	initial weight	flask	flask, POM (oven-dry)	POM (oven-dry)	POM (oven-dry)				POM release
					[J/ml]	[g]	[g]	[g]	[g/kg]	[g/kg]				sandy soil	mv			sd
		sandy	filled up	A	0	20,00	9,0104	9,1585	7,40	16,14					fPOM	oPOM	fPOM+oPOM	fPOM	oPOM
				B	0	20,00	9,0837	9,2128	6,45	15,21				filled up	6,86	8,84	15,70	1,37	0,20
				C	0	20,00	8,4283	8,5753	7,35	16,40				trickled	13,52	7,28	20,80	2,97	2,12
				D	0	20,00	8,6369	8,8168	9,00	17,77				rotated	9,37	7,81	17,18	1,79	1,65
				E	0	20,00	9,6355	9,7508	5,76	14,90				pre-sonicated	12,97	5,73	18,69	2,81	1,33
				F	0	20,00	8,6538	8,7571	5,16	13,78
				A	50	20,00	8,1494	8,3241	8,73
				B	50	20,00	9,0205	9,1956	8,76
				C	50	20,00	8,6165	8,7975	9,05
				D	50	20,00	8,5283	8,7038	8,77
				E	50	20,00	8,7585	8,9412	9,14
				F	50	20,00	8,9845	9,1567	8,61
				A	residuum	20,00	22,7900	64,1090	2065,95
				B	residuum	20,00	22,2600	60,8960	1931,80
				C	residuum	20,00	23,7000	65,9790	2113,95
				D	residuum	20,00	22,1800	61,6880	1975,40
				E	residuum	20,00	22,1700	59,7930	1881,15
				F	residuum	20,00	21,9900	62,6850	2034,75
			trickled	A*	0	20,00	9,2393	9,5627	16,17	24,07
				B*	0	20,00	8,1091	8,4254	15,82	23,12
				C*	0	20,00	9,7401	10,0659	16,29	23,23
				D	0	20,00	8,8089	9,0411	11,61	21,90
				E*	0	20,00	8,4063	8,5924	9,31	16,85
				F	0	20,00	9,1636	9,4018	11,91	15,61
				A*	50	20,00	8,9486	9,1067	7,90
				B*	50	20,00	8,6518	8,7978	7,30
				C*	50	20,00	9,0143	9,1532	6,94
				D	50	20,00	8,7433	8,9490	10,29
				E*	50	20,00	8,2799	8,4307	7,54
				F	50	20,00	8,6885	8,7581	3,70
				A*	residuum	20,00	24,9220	53,2150	1414,65
				B*	residuum	20,00	22,3480	48,9920	1332,20
				C*	residuum	20,00	23,9830	51,2310	1362,40
				D	residuum	20,00	22,8400	62,7800	1997,00
				E*	residuum	20,00	23,9440	52,2300	1414,30
				F	residuum	20,00	22,8200	57,5600	1737,00
			rotated	A	0	20,00	8,7408	8,9627	11,10	18,24
				B	0	20,00	9,0229	9,2356	10,64	18,27
				C	0	20,00	8,4983	8,6284	6,50	15,91
				D	0	20,00	8,4922	8,6500	7,89	17,61
				E	0	20,00	8,6353	8,8311	9,79	14,95
				F	0	20,00	9,2610	9,4666	10,28	18,10
				A	50	20,00	8,5154	8,6582	7,14
				B	50	20,00	8,3772	8,5298	7,63
				C	50	20,00	9,2763	9,4645	9,41
				D	50	20,00	8,6218	8,8161	9,72
				E	50	20,00	8,9187	9,0219	5,16
				F	50	20,00	9,1099	9,2663	7,82
				A	residuum	20,00	24,0200	61,2140	1859,70
				B	residuum	20,00	22,7800	60,8590	1903,95
				C	residuum	20,00	24,3300	63,6280	1964,90
				D	residuum	20,00	23,0700	62,7420	1983,60
				E	residuum	20,00	22,5900	61,9500	1968,00
				F	residuum	20,00	22,1200	61,9310	1990,55
			pre-sonicated	A	3	20,00	8,7436	9,0195	13,80	18,03
				B*	3	20,00	9,5272	9,8301	15,15	20,34
				C	3	20,00	8,6590	8,8332	8,71	13,37
				D*	3	20,00	8,6620	8,9805	15,92	22,06
				E	3	20,00	8,6279	8,8363	10,42	16,65
				F	3	20,00	8,5814	8,8575	13,81	21,73
				A	47	20,00	9,5354	9,6201	4,24
				B*	47	20,00	9,2594	9,3632	5,19
				C	47	20,00	8,8191	8,9123	4,66
				D*	47	20,00	8,3177	8,4404	6,14
				E	47	20,00	8,4720	8,5965	6,23
				F	47	20,00	8,5123	8,6707	7,92
				A	residuum	20,00	23,9800	64,8090	2041,45
				B*	residuum	20,00	23,6410	50,8870	1362,30
				C	residuum	20,00	22,2400	63,0170	2038,85
				D*	residuum	20,00	23,0180	50,2290	1360,55
				E	residuum	20,00	22,6500	64,8320	2109,10					POM release
				F	residuum	20,00	22,7400	60,6920	1897,60					loamy soil	mv			sd
		loamy	filled up	A	0	20,00	8,9185	9,0441	6,28	19,42					fPOM	oPOM	fPOM+oPOM	fPOM	oPOM
				B	0	20,00	9,7669	9,8542	4,37	20,46				filled up	5,44	13,42	18,86	1,67	1,43
				C	0	20,00	8,8291	8,9464	5,87	17,63				trickled	14,94	12,39	27,33	1,96	2,19
				D	0	20,00	8,8581	8,9454	4,36	17,78				rotated	9,68	12,82	22,50	0,95	0,87
				E	0	20,00	10,3873	10,4591	3,59	16,73				pre-sonicated	15,64	1,96	17,60	1,69	1,67
				F	0	20,00	8,8060	8,9692	8,16	21,15
				A	50	20,00	8,8395	9,1022	13,14
				B	50	20,00	8,5581	8,8799	16,09
				C	50	20,00	8,7711	9,0064	11,76
				D	50	20,00	8,2439	8,5122	13,42
				E	50	20,00	9,3642	9,6270	13,14
				F	50	20,00	8,7906	9,0504	12,99
				A	residuum	20,00	22,6200	50,2860	1383,30
				B	residuum	20,00	24,0900	52,0940	1400,20
				C	residuum	20,00	23,6700	53,6740	1500,20
				D	residuum	20,00	24,1500	52,6750	1426,25
				E	residuum	20,00	23,6500	51,8720	1411,10
				F	residuum	20,00	23,3300	53,6560	1516,30
			trickled	A	0	20,00	9,3907	9,7318	17,06	30,56
				B	0	20,00	8,4568	8,7499	14,66	27,37
				C	0	20,00	9,1834	9,4852	15,09	28,37
				D	0	20,00	9,0143	9,3114	14,86	28,80
				E	0	20,00	9,4934	9,7229	11,48	24,33
				F	0	20,00	8,7431	9,0738	16,54	24,55
				A	50	20,00	8,6006	8,8708	13,51
				B	50	20,00	8,5804	8,8347	12,72
				C	50	20,00	10,0357	10,3013	13,28
				D	50	20,00	8,9139	9,1927	13,94
				E	50	20,00	8,9601	9,2173	12,86
				F	50	20,00	8,5560	8,7163	8,02
				A	residuum	20,00	22,9500	52,0080	1452,90
				B	residuum	20,00	23,4600	51,0880	1381,40
				C	residuum	20,00	23,0800	51,3530	1413,65
				D	residuum	20,00	24,3300	52,4060	1403,80
				E	residuum	20,00	22,7500	52,1440	1469,70
				F	residuum	20,00	24,0500	43,4880	971,90
			rotated	A	0	20,00	8,6089	8,8075	9,93	21,96
				B	0	20,00	8,7249	8,9341	10,46	22,99
				C	0	20,00	8,4624	8,6642	10,09	22,48
				D	0	20,00	8,9494	9,1188	8,47	20,61
				E	0	20,00	8,5829	8,7951	10,61	24,54
				F	0	20,00	8,4807	8,6510	8,51	22,44
				A	50	20,00	8,7396	8,9802	12,03
				B	50	20,00	9,0397	9,2902	12,53
				C	50	20,00	8,8526	9,1004	12,39
				D	50	20,00	8,6401	8,8829	12,14
				E	50	20,00	9,3068	9,5854	13,93
				F	50	20,00	8,7057	8,9843	13,93
				A	residuum	20,00	23,2500	52,0200	1438,50
				B	residuum	20,00	24,2400	51,0560	1340,80
				C	residuum	20,00	22,6300	50,4950	1393,25
				D	residuum	20,00	23,6600	52,2300	1428,50
				E	residuum	20,00	22,6700	51,2140	1427,20
				F	residuum	20,00	24,8900	53,3890	1424,95
			pre-sonicated	A	15	20,00	9,1900	9,5146	16,23	16,65
				B	15	20,00	9,2795	9,5826	15,15	15,47
				C	15	20,00	8,5246	8,8028	13,91	18,61
				D	15	20,00	8,4998	8,7784	13,93	16,27
				E	15	20,00	8,8306	9,1557	16,26	19,04
				F	15	20,00	9,3870	9,7544	18,37	19,58
				A	35	20,00	9,0352	9,0436	0,42
				B	35	20,00	8,7641	8,7704	0,32
				C	35	20,00	8,7091	8,8031	4,70
				D	35	20,00	8,6357	8,6825	2,34
				E	35	20,00	8,6580	8,7136	2,78
				F	35	20,00	8,6875	8,7116	1,21
				A	residuum	20,00	23,0800	50,2520	1358,60
				B	residuum	20,00	24,0800	52,0310	1397,55
				C	residuum	20,00	23,5500	52,7440	1459,70
				D	residuum	20,00	25,1500	52,8200	1383,50
				E	residuum	20,00	25,0800	53,6640	1429,20
				F	residuum	20,00	23,9100	51,4240	1375,70

## Sheet: Statistics Corg
		basic data							Corg fraction
		soil	variant	parallels	q	initial weight	flask	flask, POM (oven-dry)	Crel				Corg release [%]
					[J/ml]	[g]	[g]	[g]	[wt%]				sandy soil	mv			sd
		sandy	filled up	A	0	20,00	9,0104	9,1585	5,41					fPOM	oPOM	residuum	fPOM	oPOM	residuum
				B	0	20,00	8,6369	8,8168	4,74				filled up	4,68	8,23	87,10	0,91	1,67	2,26
				C	0	20,00	8,1494	8,3241	4,70				trickled	8,97	6,37	84,66	1,62	2,10	2,33
				D	0	20,00	8,5283	8,7038	5,90				rotated	6,67	7,65	85,68	1,36	1,69	1,16
				E	0	20,00	22,7900	64,1090	3,69				pre-sonicated	11,46	4,75	83,79	2,16	1,39	2,84
				F	0	20,00	22,1800	61,6880	3,62
				A	50	20,00	9,0837	9,2128	9,05
				B	50	20,00	9,6355	9,7508	8,36
				C	50	20,00	9,0205	9,1956	9,04
				D	50	20,00	8,7585	8,9412	8,75
				E	50	20,00	22,2600	60,8960	9,27
				F	50	20,00	22,1700	59,7930	4,88
				A	residuum	20,00	8,4283	8,5753	85,54
				B	residuum	20,00	8,6538	8,7571	86,90
				C	residuum	20,00	8,6165	8,7975	86,26
				D	residuum	20,00	8,9845	9,1567	85,35
				E	residuum	20,00	23,7000	65,9790	87,04
				F	residuum	20,00	21,9900	62,6850	91,50
			trickled	A*	0	20,00	9,2393	9,5627	10,26
				B*	0	20,00	8,8089	9,0411	10,39
				C*	0	20,00	8,9486	9,1067	9,50
				D	0	20,00	8,7433	8,9490	8,26
				E*	0	20,00	24,9220	53,2150	6,06
				F	0	20,00	22,8400	62,7800	9,37
				A*	50	20,00	8,1091	8,4254	6,70
				B*	50	20,00	8,4063	8,5924	6,40
				C*	50	20,00	8,6518	8,7978	6,07
				D	50	20,00	8,2799	8,4307	9,51
				E*	50	20,00	22,3480	48,9920	6,61
				F	50	20,00	23,9440	52,2300	2,93
				A*	residuum	20,00	9,7401	10,0659	83,04
				B*	residuum	20,00	9,1636	9,4018	83,21
				C*	residuum	20,00	9,0143	9,1532	84,43
				D	residuum	20,00	8,6885	8,7581	82,22
				E*	residuum	20,00	23,9830	51,2310	87,34
				F	residuum	20,00	22,8200	57,5600	87,70
			rotated	A	0	20,00	8,7408	8,9627	7,17
				B	0	20,00	8,4922	8,6500	8,26
				C	0	20,00	8,5154	8,6582	4,49
				D	0	20,00	8,6218	8,8161	5,65
				E	0	20,00	24,0200	61,2140	7,38
				F	0	20,00	23,0700	62,7420	7,07
				A	50	20,00	9,0229	9,2356	6,62
				B	50	20,00	8,6353	8,8311	7,39
				C	50	20,00	8,3772	8,5298	9,37
				D	50	20,00	8,9187	9,0219	9,61
				E	50	20,00	22,7800	60,8590	5,12
				F	50	20,00	22,5900	61,9500	7,79
				A	residuum	20,00	8,4983	8,6284	86,21
				B	residuum	20,00	9,2610	9,4666	84,35
				C	residuum	20,00	9,2763	9,4645	86,14
				D	residuum	20,00	9,1099	9,2663	84,74
				E	residuum	20,00	24,3300	63,6280	87,50
				F	residuum	20,00	22,1200	61,9310	85,14
			pre-sonicated	A	3	20,00	8,7436	9,0195	12,83
				B*	3	20,00	8,6620	8,9805	12,71
				C	3	20,00	9,5354	9,6201	7,93
				D*	3	20,00	8,3177	8,4404	13,36
				E	3	20,00	23,9800	64,8090	9,67
				F	3	20,00	23,0180	50,2290	12,25
				A	47	20,00	9,5272	9,8301	3,72
				B*	47	20,00	8,6279	8,8363	4,32
				C	47	20,00	9,2594	9,3632	3,06
				D*	47	20,00	8,4720	8,5965	4,73
				E	47	20,00	23,6410	50,8870	5,84
				F	47	20,00	22,6500	64,8320	6,85
				A	residuum	20,00	8,6590	8,8332	83,46
				B*	residuum	20,00	8,5814	8,8575	82,97
				C	residuum	20,00	8,8191	8,9123	89,00
				D*	residuum	20,00	8,5123	8,6707	81,91
				E	residuum	20,00	22,2400	63,0170	84,49				Corg release [%]
				F	residuum	20,00	22,7400	60,6920	80,90				loamy soil	mv			sd
		loamy	filled up	A	0	20,00	8,9185	9,0441	5,31					fPOM	oPOM	residuum	fPOM	oPOM	residuum
				B	0	20,00	8,8581	8,9454	3,56				fill-up	5,18	17,31	77,50	1,46	5,00	5,76
				C	0	20,00	8,8395	9,1022	5,25				trickle	13,78	13,54	72,68	3,01	1,21	2,20
				D	0	20,00	8,2439	8,5122	6,75				rotate	8,62	13,88	77,50	0,88	0,83	0,76
				E	0	20,00	22,6200	50,2860	3,45				USmin	17,13	1,86	81,01	1,16	1,65	1,16
				F	0	20,00	24,1500	52,6750	6,79
				A	50	20,00	9,7669	9,8542	15,43
				B	50	20,00	10,3873	10,4591	15,94
				C	50	20,00	8,5581	8,8799	14,20
				D	50	20,00	9,3642	9,6270	27,40
				E	50	20,00	24,0900	52,0940	16,29
				F	50	20,00	23,6500	51,8720	14,63
				A	residuum	20,00	8,8291	8,9464	79,27
				B	residuum	20,00	8,8060	8,9692	80,50
				C	residuum	20,00	8,7711	9,0064	80,55
				D	residuum	20,00	8,7906	9,0504	65,86
				E	residuum	20,00	23,6700	53,6740	80,26
				F	residuum	20,00	23,3300	53,6560	78,59
			trickled	A	0	20,00	9,3907	9,7318	14,42
				B	0	20,00	9,0143	9,3114	12,36
				C	0	20,00	8,6006	8,8708	12,81
				D	0	20,00	8,9139	9,1927	13,29
				E	0	20,00	22,9500	52,0080	10,47
				F	0	20,00	24,3300	52,4060	19,34
				A	50	20,00	8,4568	8,7499	13,89
				B	50	20,00	9,4934	9,7229	13,14
				C	50	20,00	8,5804	8,8347	13,69
				D	50	20,00	8,9601	9,2173	14,90
				E	50	20,00	23,4600	51,0880	14,21
				F	50	20,00	22,7500	52,1440	11,38
				A	residuum	20,00	9,1834	9,4852	71,69
				B	residuum	20,00	8,7431	9,0738	74,49
				C	residuum	20,00	10,0357	10,3013	73,51
				D	residuum	20,00	8,5560	8,7163	71,81
				E	residuum	20,00	23,0800	51,3530	75,32
				F	residuum	20,00	24,0500	43,4880	69,28
			rotated	A	0	20,00	8,6089	8,8075	9,25
				B	0	20,00	8,9494	9,1188	8,93
				C	0	20,00	8,7396	8,9802	9,41
				D	0	20,00	8,6401	8,8829	7,69
				E	0	20,00	23,2500	52,0200	9,10
				F	0	20,00	23,6600	52,2300	7,34
				A	50	20,00	8,7249	8,9341	12,94
				B	50	20,00	8,5829	8,7951	13,36
				C	50	20,00	9,0397	9,2902	13,32
				D	50	20,00	9,3068	9,5854	13,91
				E	50	20,00	24,2400	51,0560	14,77
				F	50	20,00	22,6700	51,2140	14,97
				A	residuum	20,00	8,4624	8,6642	77,80
				B	residuum	20,00	8,4807	8,6510	77,71
				C	residuum	20,00	8,8526	9,1004	77,27
				D	residuum	20,00	8,7057	8,9843	78,41
				E	residuum	20,00	22,6300	50,4950	76,13
				F	residuum	20,00	24,8900	53,3890	77,69
			pre-sonicated	A	15	20,00	9,1900	9,5146	18,36
				B	15	20,00	8,4998	8,7784	16,92
				C	15	20,00	9,0352	9,0436	15,83
				D	15	20,00	8,6357	8,6825	15,99
				E	15	20,00	23,0800	50,2520	17,08
				F	15	20,00	25,1500	52,8200	18,62
				A	35	20,00	9,2795	9,5826	0,39
				B	35	20,00	8,8306	9,1557	0,35
				C	35	20,00	8,7641	8,7704	4,72
				D	35	20,00	8,6580	8,7136	2,25
				E	35	20,00	24,0800	52,0310	2,37
				F	35	20,00	25,0800	53,6640	1,07
				A	residuum	20,00	8,5246	8,8028	81,25
				B	residuum	20,00	9,3870	9,7544	82,74
				C	residuum	20,00	8,7091	8,8031	79,44
				D	residuum	20,00	8,6875	8,7116	81,77
				E	residuum	20,00	23,5500	52,7440	80,55
				F	residuum	20,00	23,9100	51,4240	80,31

## Sheet: Statistics CN ratio
		basic data
		soil	variant	parallels	q	initial weight	flask	flask, POM (oven-dry)	C:N				C:N ratio
					[J/ml]	[g]	[g]	[g]	[-]				sandy soil	mv			sd
		sandy	filled up	A	0	20,00	9,0104	9,1585	21,07					fPOM	oPOM	residuum	fPOM	oPOM	residuum
				B	0	20,00	8,6369	8,8168	22,01				filled up	20,84	18,94	8,76	1,35	0,47	0,21
				C	0	20,00	8,1494	8,3241	19,37				trickled	19,46	16,02	9,40	0,96	0,66	0,48
				D	0	20,00	8,5283	8,7038	21,56				rotated	19,88	17,39	8,75	1,01	1,09	0,15
				E	0	20,00	22,7900	64,1090	18,98				pre-sonicated	20,81	15,45	9,13	1,87	0,77	0,52
				F	0	20,00	22,1800	61,6880	22,06
				A	50	20,00	9,0837	9,2128	18,94
				B	50	20,00	9,6355	9,7508	19,66
				C	50	20,00	9,0205	9,1956	18,45
				D	50	20,00	8,7585	8,9412	18,39
				E	50	20,00	22,2600	60,8960	19,18
				F	50	20,00	22,1700	59,7930	19,04
				A	residuum	20,00	8,4283	8,5753	8,62
				B	residuum	20,00	8,6538	8,7571	9,04
				C	residuum	20,00	8,6165	8,7975	8,49
				D	residuum	20,00	8,9845	9,1567	8,78
				E	residuum	20,00	23,7000	65,9790	8,94
				F	residuum	20,00	21,9900	62,6850	8,68
			trickled	A*	0	20,00	9,2393	9,5627	19,23
				B*	0	20,00	8,8089	9,0411	18,17
				C*	0	20,00	8,9486	9,1067	19,63
				D	0	20,00	8,7433	8,9490	21,07
				E*	0	20,00	24,9220	53,2150	19,00
				F	0	20,00	22,8400	62,7800	19,67
				A*	50	20,00	8,1091	8,4254	15,59
				B*	50	20,00	8,4063	8,5924	16,23
				C*	50	20,00	8,6518	8,7978	15,87
				D	50	20,00	8,2799	8,4307	16,89
				E*	50	20,00	22,3480	48,9920	16,50
				F	50	20,00	23,9440	52,2300	15,06
				A*	residuum	20,00	9,7401	10,0659	9,66
				B*	residuum	20,00	9,1636	9,4018	9,76
				C*	residuum	20,00	9,0143	9,1532	9,64
				D	residuum	20,00	8,6885	8,7581	8,60
				E*	residuum	20,00	23,9830	51,2310	9,71
				F	residuum	20,00	22,8200	57,5600	9,01
			rotated	A	0	20,00	8,7408	8,9627	20,11
				B	0	20,00	8,4922	8,6500	20,19
				C	0	20,00	8,5154	8,6582	17,86
				D	0	20,00	8,6218	8,8161	20,32
				E	0	20,00	24,0200	61,2140	20,71
				F	0	20,00	23,0700	62,7420	20,06
				A	50	20,00	9,0229	9,2356	16,04
				B	50	20,00	8,6353	8,8311	16,20
				C	50	20,00	8,3772	8,5298	17,54
				D	50	20,00	8,9187	9,0219	17,88
				E	50	20,00	22,7800	60,8590	18,90
				F	50	20,00	22,5900	61,9500	17,80
				A	residuum	20,00	8,4983	8,6284	8,91
				B	residuum	20,00	9,2610	9,4666	8,76
				C	residuum	20,00	9,2763	9,4645	8,93
				D	residuum	20,00	9,1099	9,2663	8,71
				E	residuum	20,00	24,3300	63,6280	8,63
				F	residuum	20,00	22,1200	61,9310	8,57
			pre-sonicated	A	3	20,00	8,7436	9,0195	22,30
				B*	3	20,00	8,6620	8,9805	19,14
				C	3	20,00	9,5354	9,6201	23,52
				D*	3	20,00	8,3177	8,4404	20,20
				E	3	20,00	23,9800	64,8090	21,05
				F	3	20,00	23,0180	50,2290	18,65
				A	47	20,00	9,5272	9,8301	15,30
				B*	47	20,00	8,6279	8,8363	14,55
				C	47	20,00	9,2594	9,3632	15,92
				D*	47	20,00	8,4720	8,5965	15,16
				E	47	20,00	23,6410	50,8870	16,73
				F	47	20,00	22,6500	64,8320	15,03
				A	residuum	20,00	8,6590	8,8332	8,95
				B*	residuum	20,00	8,5814	8,8575	9,64
				C	residuum	20,00	8,8191	8,9123	9,31
				D*	residuum	20,00	8,5123	8,6707	9,75
				E	residuum	20,00	22,2400	63,0170	8,47				C:N ratio
				F	residuum	20,00	22,7400	60,6920	8,67				loamy soil	mv			sd
		loamy	filled up	A	0	20,00	8,9185	9,0441	26,09					fPOM	oPOM	residuum	fPOM	oPOM	residuum
				B	0	20,00	8,8581	8,9454	24,35				filled up	26,05	22,00	12,15	0,93	0,89	0,27
				C	0	20,00	8,8395	9,1022	26,51				trickled	25,34	20,07	11,79	1,55	0,29	0,32
				D	0	20,00	8,2439	8,5122	25,80				rotated	27,62	20,52	12,01	1,55	0,78	0,35
				E	0	20,00	22,6200	50,2860	26,50				pre-sonicated	24,15	20,23	12,53	0,61	5,45	0,20
				F	0	20,00	24,1500	52,6750	27,04
				A	50	20,00	9,7669	9,8542	22,46
				B	50	20,00	10,3873	10,4591	22,22
				C	50	20,00	8,5581	8,8799	21,20
				D	50	20,00	9,3642	9,6270	22,12
				E	50	20,00	24,0900	52,0940	23,23
				F	50	20,00	23,6500	51,8720	20,75
				A	residuum	20,00	8,8291	8,9464	12,41
				B	residuum	20,00	8,8060	8,9692	12,24
				C	residuum	20,00	8,7711	9,0064	11,94
				D	residuum	20,00	8,7906	9,0504	12,44
				E	residuum	20,00	23,6700	53,6740	12,11
				F	residuum	20,00	23,3300	53,6560	11,76
			trickled	A	0	20,00	9,3907	9,7318	25,35
				B	0	20,00	9,0143	9,3114	23,95
				C	0	20,00	8,6006	8,8708	24,58
				D	0	20,00	8,9139	9,1927	25,94
				E	0	20,00	22,9500	52,0080	24,13
				F	0	20,00	24,3300	52,4060	28,10
				A	50	20,00	8,4568	8,7499	19,92
				B	50	20,00	9,4934	9,7229	20,51
				C	50	20,00	8,5804	8,8347	19,93
				D	50	20,00	8,9601	9,2173	19,68
				E	50	20,00	23,4600	51,0880	20,12
				F	50	20,00	22,7500	52,1440	20,26
				A	residuum	20,00	9,1834	9,4852	11,48
				B	residuum	20,00	8,7431	9,0738	12,32
				C	residuum	20,00	10,0357	10,3013	11,89
				D	residuum	20,00	8,5560	8,7163	11,66
				E	residuum	20,00	23,0800	51,3530	11,50
				F	residuum	20,00	24,0500	43,4880	11,89
			rotated	A	0	20,00	8,6089	8,8075	26,25
				B	0	20,00	8,9494	9,1188	25,96
				C	0	20,00	8,7396	8,9802	27,89
				D	0	20,00	8,6401	8,8829	27,90
				E	0	20,00	23,2500	52,0200	30,31
				F	0	20,00	23,6600	52,2300	27,43
				A	50	20,00	8,7249	8,9341	19,51
				B	50	20,00	8,5829	8,7951	20,36
				C	50	20,00	9,0397	9,2902	19,72
				D	50	20,00	9,3068	9,5854	21,01
				E	50	20,00	24,2400	51,0560	21,33
				F	50	20,00	22,6700	51,2140	21,19
				A	residuum	20,00	8,4624	8,6642	11,98
				B	residuum	20,00	8,4807	8,6510	12,70
				C	residuum	20,00	8,8526	9,1004	11,83
				D	residuum	20,00	8,7057	8,9843	11,75
				E	residuum	20,00	22,6300	50,4950	12,03
				F	residuum	20,00	24,8900	53,3890	11,81
			pre-sonicated	A	15	20,00	9,1900	9,5146	24,48
				B	15	20,00	8,4998	8,7784	24,22
				C	15	20,00	9,0352	9,0436	24,44
				D	15	20,00	8,6357	8,6825	24,71
				E	15	20,00	23,0800	50,2520	24,06
				F	15	20,00	25,1500	52,8200	22,99
				A	35	20,00	9,2795	9,5826	17,58
				B	35	20,00	8,8306	9,1557	31,18
				C	35	20,00	8,7641	8,7704	17,96
				D	35	20,00	8,6580	8,7136	18,03
				E	35	20,00	24,0800	52,0310	16,82
				F	35	20,00	25,0800	53,6640	19,80
				A	residuum	20,00	8,5246	8,8028	12,56
				B	residuum	20,00	9,3870	9,7544	12,78
				C	residuum	20,00	8,7091	8,8031	12,20
				D	residuum	20,00	8,6875	8,7116	12,65
				E	residuum	20,00	23,5500	52,7440	12,55
				F	residuum	20,00	23,9100	51,4240	12,44
